# Supplementary material for: Development and Characterization of n-Propyl Gallate Encapsulated Solid Lipid Nanoparticles-Loaded Hydrogel for Intranasal Delivery
Source: MDPI journal article supplement (doi:10.3390/ph14070696), 2021-07-19
Supplement: s1 [file s1]

# Development and Characterization of *n*-Propyl gallate Encapsulated Solid Lipid Nanoparticles-Loaded Hydrogel for Intranasal Delivery

Fakhara Sabir <sup>1</sup>, Gábor Katona <sup>1</sup>, Ruba Ismail <sup>1,2</sup>, Rita Ambrus <sup>1</sup>, Bence Sipos <sup>1</sup>, Ildikó Csóka <sup>1\*</sup>

<sup>1</sup>Institute of Pharmaceutical Technology and Regulatory Affairs, Faculty of Pharmacy, University of Szeged, Eötvös Str. 6, H-6720 Szeged, Hungary; [fakhra.sabir@gmail.com](mailto:fakhra.sabir@gmail.com) (F.S.); [katona.gabor@szte.hu](mailto:katona.gabor@szte.hu) (G.K.); [ruba.ismail@szte.hu](mailto:ruba.ismail@szte.hu) (R.I.); [ambrus.rita@szte.hu](mailto:ambrus.rita@szte.hu) (R.A.); [sipos.bence@szte.hu](mailto:sipos.bence@szte.hu) (B.S.); [csoka.ildiko@szte.hu](mailto:csoka.ildiko@szte.hu) (I.C.)

<sup>2</sup>Faculty of Science and Informatics, Department of Applied & Environmental Chemistry, Rerrich Béla sq. 1, H-6720, Szeged, Hungary

\*Correspondence: [csoka.ildiko@szte.hu](mailto:csoka.ildiko@szte.hu), Tel. +36-62-546-116

## Supplementary material

(a)

| QTPP \ CQA               | Route of administration | Indication | Dissolution profile | Permeability profile | Stability | Brain distribution |
|--------------------------|-------------------------|------------|---------------------|----------------------|-----------|--------------------|
| Z-average, PDI           | M                       | H          | H                   | H                    | M         | M                  |
| Zeta potential           | M                       | L          | H                   | H                    | H         | M                  |
| Encapsulation efficiency | M                       | M          | H                   | M                    | L         | M                  |
| Mucoadhesion             | H                       | L          | L                   | L                    | L         | L                  |
| Viscosity                | H                       | L          | L                   | L                    | L         | L                  |
| Swelling properties      | M                       | L          | M                   | M                    | L         | L                  |

(b)

| CPP/CMA \ CQA            | Material attributives  |                     |                  |                      | Subprocesses |                        |                                 |               |
|--------------------------|------------------------|---------------------|------------------|----------------------|--------------|------------------------|---------------------------------|---------------|
|                          | Ratio of organic phase | Cholesterol content | Tween 80 content | Temp. at dissolution | Sonication   | Injection and stirring | Evaporation of organic solvents | Freeze-drying |
| Z-average, PDI           | M                      | H                   | H                | H                    | M            | M                      | M                               | M             |
| Zeta potential           | M                      | H                   | H                | H                    | M            | M                      | M                               | M             |
| Encapsulation efficiency | M                      | H                   | H                | M                    | M            | L                      | L                               | L             |
| Mucoadhesion             | L                      | M                   | M                | L                    | L            | L                      | L                               | L             |
| Viscosity                | L                      | L                   | M                | M                    | L            | L                      | L                               | L             |
| Swelling properties      | L                      | M                   | M                | L                    | L            | L                      | L                               | L             |

**Figure S1.** Interdependence rating amongst QTPP – CQA (a) and CPP/CMA – CQA (b) elements. The relations are presented on a 3-grade scale as: “H” as high, marked with red; “M” as medium, marked with orange; and “L” as low, marked with green.

(a)

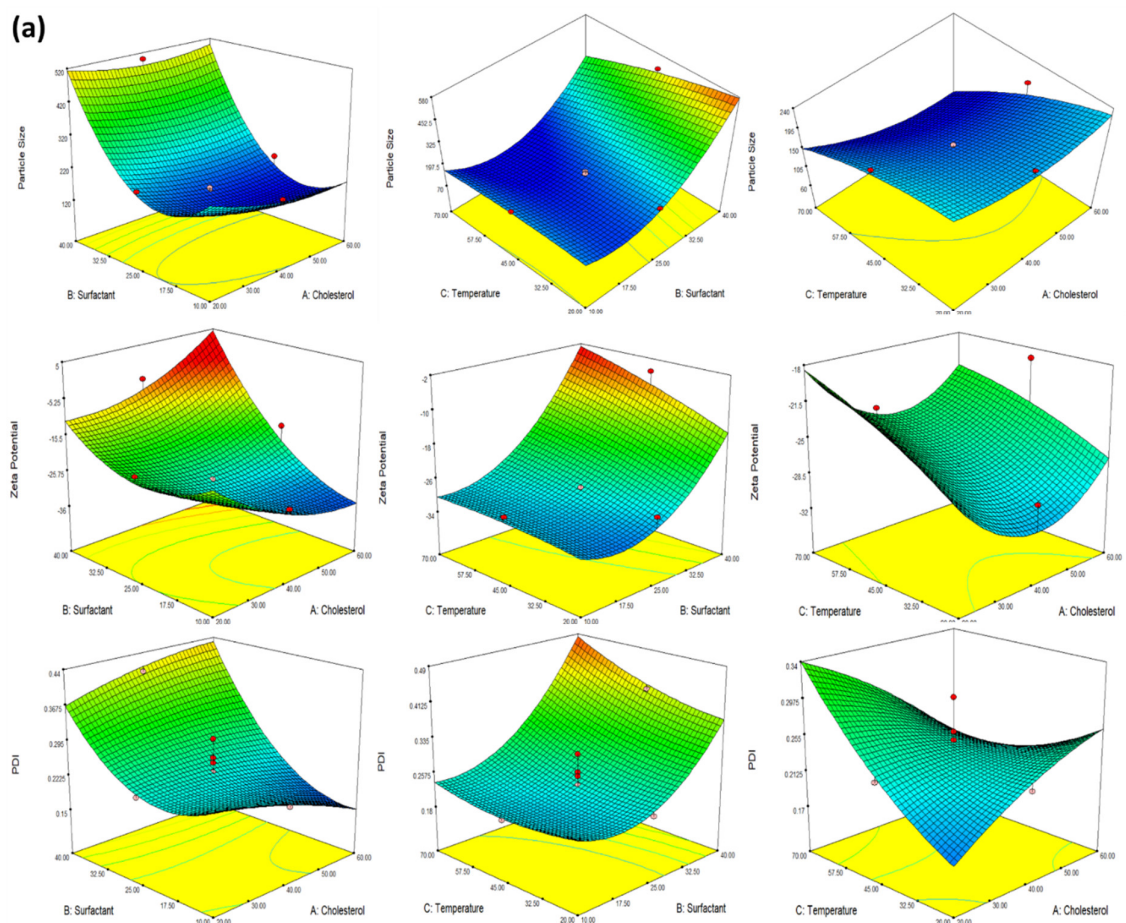

(b)

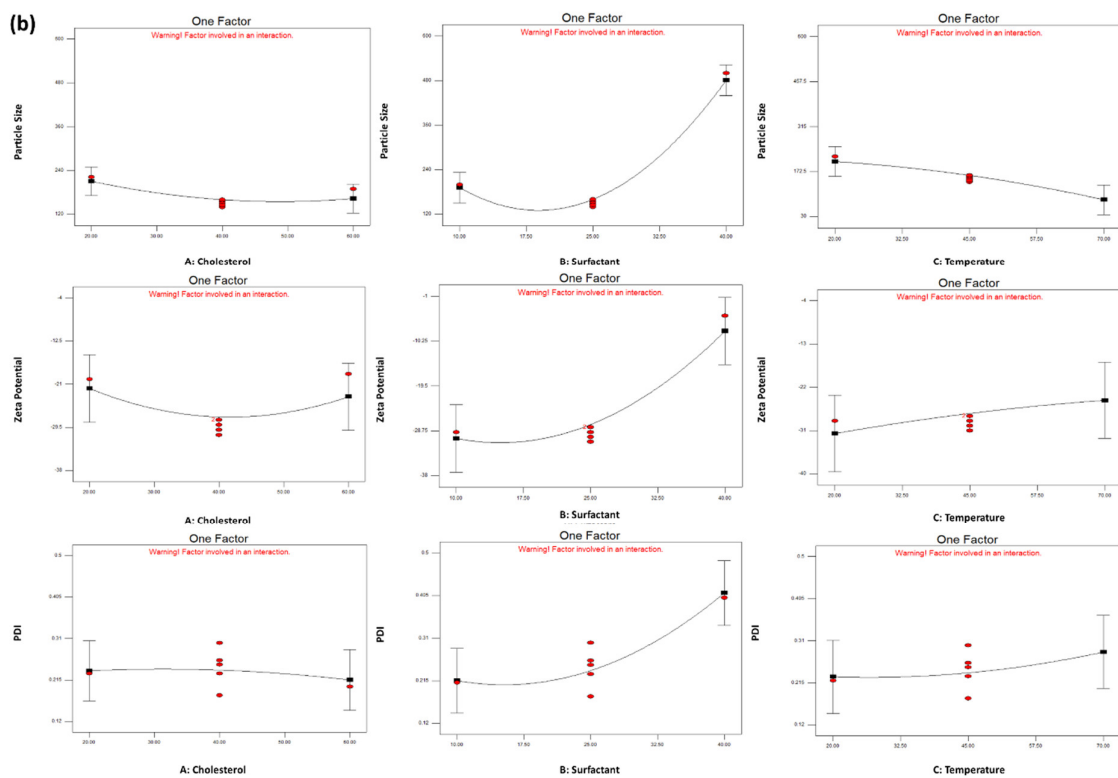

**Figure S2.** 3D surface plot (a) and one-factor interaction (b) graph showing the effects of surfactant and cholesterol on Particle Size, PDI and Zeta potential

**Table S1.** Kinetic parameters of in vitro drug release

| Kinetic Model           | Kinetic Parameters                                | PG dispersion       | PG-SLNs       | 1% w/v SLNs-HGnCL |
|-------------------------|---------------------------------------------------|---------------------|---------------|-------------------|
| Zero order              | $k_0$ ( $\mu\text{g min}^{-1}$ )                  | 0.391               | 0.094         | 0.263             |
|                         | $R^2$                                             | 0.791               | 0.8158        | 0.8803            |
|                         | $t_{0.5}$ (min)                                   | 1950.83             | 467.64        | 1315.63           |
| First order             | $k_1 \times 10^{-3}$ ( $\text{min}^{-1}$ )        | 0.191               | 0.419         | 1.178             |
|                         | $R^2$                                             | 0.8463              | 0.9299        | 0.9318            |
|                         | $t_{0.5}$ (min)                                   | 3638.37             | 1655.35       | 588.311           |
| Higuchi model           | $k_H$ ( $\mu\text{g min}^{-1/2}$ )                | 12.007              | 32.747        | 21.461            |
|                         | $R^2$                                             | 0.9417              | 0.96          | 0.9783            |
|                         | $t_{0.5}$ (min)                                   | 6764.02             | 909.35        | 2117.26           |
| Korshmeier-Peppas model | $k_{K-P}$ ( $\text{min}^{-n}$ )                   | 1.045               | 8.876         | 6.772             |
|                         | $n$                                               | 0.43                | 0.31          | 0.28              |
|                         | $R^2$                                             | 0.9567              | 0.8462        | 0.8552            |
|                         | $t_{0.5}$ (min)                                   | 2065.96             | 812.34        | 1154.59           |
| Hixon-Crowell model     | $k_{H-C}$ ( $\mu\text{g}^{1/3} \text{min}^{-1}$ ) | 0.011               | 0.163         | 0.039             |
|                         | $R^2$                                             | 0.9838              | 0.8535        | 0.9391            |
|                         | $t_{0.5}$ (min)                                   | 12090.3             | 1979.38       | 2688.46           |
| Best fit                |                                                   | Hixon-Crowell model | Higuchi model | Higuchi model     |
